# Supplementary material
Source: bioRxiv or medRxiv preprint supplement (https://medrxiv.org/highwire/filestream/96981/field_highwire_adjunct_files/0/2020.09.07.20189571-1.pdf)
Supplement: Supplementary file [file 2020.09.07.20189571-1.pdf]

# Cholesteryl Ester Transfer Protein as a Drug Target

A F Schmidt et al

## *Contents*

*Search strategy*      1

*Figures*      4

*Tables*      6

*Methods*      19

*Results*      20

*Acknowledgements*      21

*Bibliography*      22

# Search strategy

## Medline

- exp Cholesteryl ester transfer protein inhibitor/
- Cholesteryl ester transfer protein inhibitor\*.tw.
- Cholesterylester transfer protein inhibitor\*.tw.
- CETP inhibitor\*.tw.
- CETPI.tw.
- Anacetrapib.tw
- MK-0859.tw
- MK0859.tw
- "MK 0859".tw.
- Dalcetrapib.tw
- JTT-705.tw
- JTT705.tw.
- JTT 705.tw
- RO-4607381.tw
- Evacetrapib.tw
- LY2484595.tw
- LY 2484595.tw
- LY-2484595.tw.
- Obicetrapib.tw.
- TA-8995.tw
- AMG-899.tw.
- DEX-001.tw.
- Torcetrapib.tw
- CP-529414.tw
- CP-529,414.tw
- or/1-25
- exp Cholesteryl ester transfer protein/
- Cholesterylester transfer protein\*.tw
- Cholesteryl ester transfer protein.tw
- Plasma lipid transfer protein\*.tw
- CETP\*.tw
- or/27-31
- exp Cardiovascular Diseases/
- cardio\*.tw.
- cardia\*.tw.
- heart\*.tw.
- coronary\*.tw.
- angina\*.tw.
- ventric\*.tw.
- myocard\*.tw.
- pericard\*.tw.
- isch?em\*.tw.
- emboli\*.tw.
- arrhythmi\*.tw.
- thrombo\*.tw.
- atrial fibrillat\*.tw.
- tachycardi\*.tw.
- endocardi\*.tw.
- (sick adj sinus).tw.
- exp Stroke/
- (stroke or stokes).tw.
- cerebrovasc\*.tw.
- cerebral vascular.tw.
- apoplexy.tw.

- (brain adj2 accident\*).tw.
- ((brain\* or cerebral or lacunar) adj2 infarct\*).tw.
- exp Hyperlipidemias/
- hyperlipid\*.tw.
- hyperlip?emia\*.tw.
- hypercholesterol\*.tw.
- hypercholester?emia\*.tw.
- hyperlipoprotein?emia\*.tw.
- hypertriglycerid?emia\*.tw.
- exp Arteriosclerosis/
- exp Cholesterol/
- cholesterol.tw.
- "coronary risk factor\* ".tw.
- or/31-67
- 26 and 32 and 68
- randomi?ed controlled trial.pt.
- controlled clinical trial.pt.
- randomi?ed.ab.
- placebo.ab.
- drug therapy.fs.
- randomly.ab.
- trial.ab.
- groups.ab.
- 70 or 71 or 72 or 73 or 74 or 75 or 76 or 77
- exp animals/ not humans.sh.
- 78 not 79
- 69 and 80

## EMBASE

- 'Cholesteryl ester transfer protein inhibitor'/exp
- Cholesteryl ester transfer protein inhibitor\*
- Cholesterylester transfer protein inhibitor\*
- CETP inhibitor\*
- CETPI
- Anacetrapib
- MK-0859
- MK0859
- "MK 0859"
- Dalcetrapib
- JTT-705
- JTT705
- JTT 705
- RO-4607381
- Evacetrapib
- LY2484595
- LY 2484595
- LY-2484595
- Obicetrapib
- TA-8995
- AMG-899
- DEX-001
- Torcetrapib
- CP-529414
- CP-529,414
- 1 OR 2 OR 3 OR 4 OR 5 OR 6 OR 7 OR 8 OR 9 OR 10 OR 11 OR 12 OR 13 OR 14 OR 15 OR 16 OR 17 OR 18 OR 19 OR 20 OR 21 OR 22 OR 23 OR 24 OR 25
- 'Cholesteryl ester transfer protein'/exp
- Cholesterylester transfer protein\*
- Cholesteryl ester transfer protein
- Plasma lipid transfer protein\*
- CETP\*
- 27 OR 28 OR 29 OR 30 OR 31
- 'cardiovascular disease'/exp
- cardio\*
- cardia\*
- heart\*
- coronary\*
- angina\*
- ventric\*

- myocard\*
- pericard\*
- isch?em\*
- emboli\*
- arrhythmi\*
- thrombo\*
- atrial fibrillat\*
- tachycardi\*
- endocardi\*
- sick NEXT/1 sinus
- 'cerebrovascular disease'/exp
- stroke or stokes
- cerebrovasc\*
- cerebral vascular
- apoplexy
- brain NEXT/3 accident\*
- (brain\* or cerebral or lacunar)  
NEXT/3 infarct\*
- exp hyperlipidemia
- hyperlipid\*
- hyperlip?emia\*
- hypercholesterol\*
- hypercholester?emia\*
- hyperlipoprotein?emia\*
- hypertriglycerid?emia\*
- 'Arteriosclerosis'/exp
- 'Cholesterol'/exp
- cholesterol
- "coronary risk factor"
- 33 OR 34 OR 35 OR 36 OR 37  
OR 38 OR 39 OR 40 OR 41 OR  
42 OR 43 OR 44 OR 45 OR 46  
OR 47 OR 48 OR 49 OR 50 OR  
51 OR 52 OR 53 OR 54 OR 55  
OR 56 OR 57 OR 58 OR 59 OR  
60 OR 61 OR 62 OR 63 OR 64  
OR 65 OR 66 OR 67
- 26 and 32 and 68
- random\$
- factorial\$
- crossover\$
- cross over\$
- cross-over\$
- placebo\$
- doubl\$ NEXT/1 blind\$
- singl\$ NEXT/1 blind\$
- assign\$
- allocat\$
- volunteer\$
- crossover procedure
- double blind procedure
- randomi?ed controlled trial
- single blind procedure
- 70 OR 71 OR 72 OR 73 OR 74  
OR 75 OR 76 OR 78 OR 79 OR  
80 OR 81 OR 82 OR 83 OR 84
- (animal or nonhuman) not  
human
- 85 not 86
- 69 and 87
- 88 AND [embase]/lim

# Figures

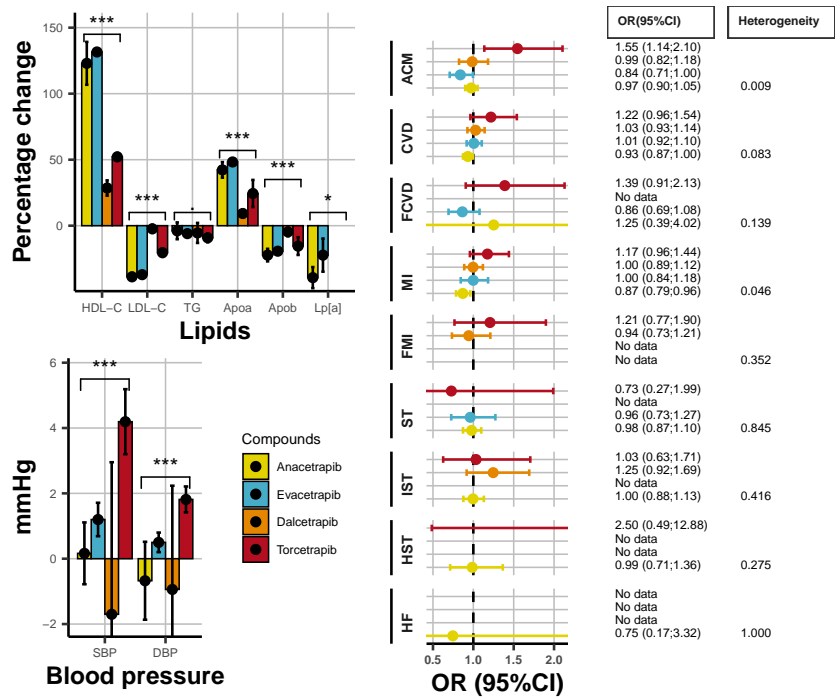

**Figure S1:** Random effects meta-analyses of CETP inhibitors. The difference column presents a p-value for the difference in OR across the 4 compounds. Similarly, \*\*\* heterogeneity p-value < 0.001, \*\* 0.01 < p-value < 0.001, \* 0.05 < p-value < 0.01, . p-value < 0.05. Abbreviations: LDL-C, low-density lipoprotein cholesterol; HDL-C, high-density lipoprotein cholesterol; TG, triglycerides; ApoB, apolipoprotein B; ApoA1, apolipoprotein A1; Lp[a], lipoprotein[a]; SBP, systolic blood pressure; DBP, diastolic blood pressure; ACM, all-cause mortality; CVD, any cardiovascular disease; FCVD, fata-CVD; MI, any myocardial infarction; FMI, fatal-MI; ST, stroke; IST, ischemic ST; HST, hemorrhagic ST; HF, heart failure.

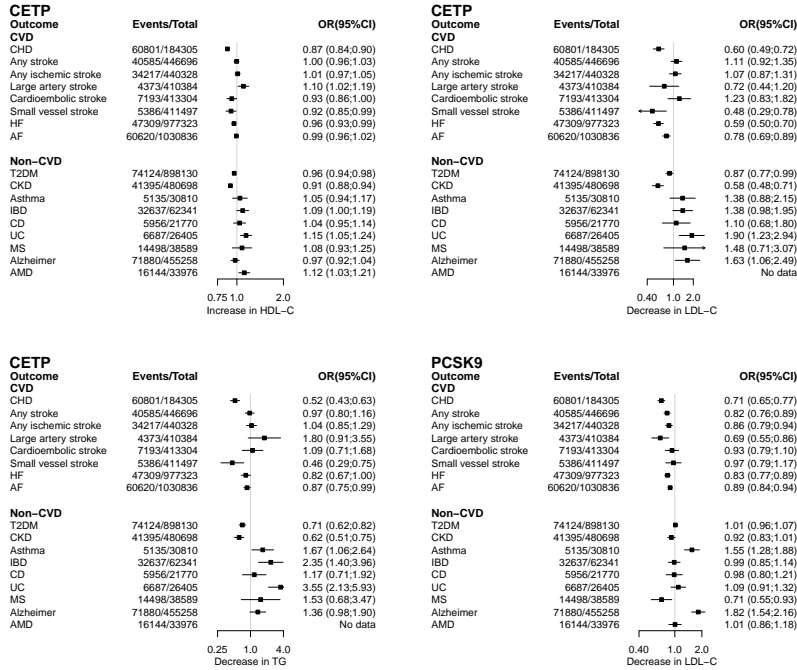

**Figure S2:** Drug target MR effects of CETP and PCSK9 clinically relevant outcomes proxied by the genetic effects on LDL-C (for *CETP* and *PCSK9*), HDL-C and TG (for *CETP*). Results are coded in the canonical, treatment direction (HDL-C increase, LDL-C and TG decrease).

## Tables

| <b>Compound</b> | <b>Maximum<br/>clinical<br/>development<br/>phase</b> |
|-----------------|-------------------------------------------------------|
| Anacetrapib     | 3                                                     |
| ATH03           | 1                                                     |
| Dalcetrapib     | 3                                                     |
| DRL-17822       | 2                                                     |
| Evacetrapib     | 3                                                     |
| JTT-302         | 2                                                     |
| K-312           | 1                                                     |
| Obicetrapib     | 2                                                     |
| Rocacetrapib    | 2                                                     |
| Torcetrapib     | 3                                                     |

**Table S1:** CETP compounds evaluated in clinical trials

**Table S2:** CETP pQTL variants selected from within and around *CETP*; before pruning by minor allele frequency and clumping on linkage disequilibrium

| rs-id       | chromosome | position<br>(build 37) | F-statistic |
|-------------|------------|------------------------|-------------|
| rs11076174  | 16         | 57003146               | 64.9        |
| rs11076175  | 16         | 57006378               | 327.2       |
| rs11076176  | 16         | 57007446               | 222.9       |
| rs11508026  | 16         | 56999328               | 340.5       |
| rs117040820 | 16         | 57005762               | 32.7        |
| rs117427818 | 16         | 57010486               | 144.2       |
| rs118146573 | 16         | 57000938               | 274.5       |
| rs12444012  | 16         | 57001438               | 330.8       |
| rs12447620  | 16         | 57014319               | 84.7        |
| rs12447839  | 16         | 56993935               | 40.2        |
| rs12447924  | 16         | 56994192               | 43.0        |
| rs12597002  | 16         | 57002404               | 55.3        |
| rs12708983  | 16         | 57014411               | 35.8        |
| rs12708985  | 16         | 57014610               | 70.6        |
| rs12720918  | 16         | 56994212               | 167.6       |
| rs12720922  | 16         | 57000885               | 332.0       |
| rs12720926  | 16         | 56998918               | 334.2       |
| rs1532624   | 16         | 57005479               | 346.1       |
| rs1532625   | 16         | 57005301               | 346.2       |
| rs158477    | 16         | 57007610               | 36.7        |
| rs158478    | 16         | 57007734               | 41.9        |
| rs158479    | 16         | 57008048               | 34.3        |
| rs158480    | 16         | 57008227               | 80.9        |
| rs158617    | 16         | 57008287               | 96.5        |
| rs17231506  | 16         | 56994528               | 442.9       |
| rs1800775   | 16         | 56995236               | 354.7       |
| rs1800777   | 16         | 57017319               | 99.6        |
| rs1864163   | 16         | 56997233               | 341.9       |
| rs1968905   | 16         | 57010948               | 34.6        |
| rs289714    | 16         | 57007451               | 191.7       |
| rs289717    | 16         | 57009388               | 101.7       |
| rs289718    | 16         | 57009932               | 109.5       |
| rs289719    | 16         | 57009941               | 109.5       |
| rs289741    | 16         | 57017474               | 96.7        |
| rs291043    | 16         | 57012699               | 101.0       |
| rs291044    | 16         | 57011452               | 101.8       |
| rs36229786  | 16         | 56993901               | 225.4       |
| rs3816117   | 16         | 56996158               | 352.3       |
| rs4369653   | 16         | 56997551               | 58.7        |
| rs4783961   | 16         | 56994894               | 80.8        |
| rs4783962   | 16         | 56995038               | 39.7        |
| rs4784741   | 16         | 57001216               | 331.3       |
| rs4784744   | 16         | 57011185               | 97.2        |
| rs4784745   | 16         | 57014875               | 102.2       |
| rs56208677  | 16         | 57010232               | 81.4        |
| rs5882      | 16         | 57016092               | 87.5        |
| rs60545348  | 16         | 57001985               | 55.3        |
| rs708272    | 16         | 56996288               | 345.1       |
| rs708273    | 16         | 56999949               | 56.1        |
| rs711751    | 16         | 56993909               | 258.7       |
| rs711752    | 16         | 56996211               | 345.2       |
| rs7203984   | 16         | 56999258               | 288.1       |
| rs7205804   | 16         | 57004889               | 346.1       |
| rs72771478  | 16         | 57002118               | 38.8        |
| rs7499892   | 16         | 57006590               | 319.7       |



**Table S2:** CETP pQTL variants selected from within and around *CETP*; before pruning by minor allele frequency and clumping on linkage disequilibrium (continued)

| rs-id       | chromosome | position (build 37) | F-statistic |
|-------------|------------|---------------------|-------------|
| rs821840    | 16         | 56993886            | 411.0       |
| rs9939224   | 16         | 57002732            | 321.1       |
| rs36229491  | 16         | 56994245            | 449.8       |
| rs34145065  | 16         | 56996646            | 349.5       |
| rs5817082   | 16         | 56997350            | 298.8       |
| rs17231569  | 16         | 56999779            | 334.2       |
| rs12720908  | 16         | 57001255            | 330.7       |
| rs200751500 | 16         | 57001275            | 325.1       |
| rs201940645 | 16         | 57001580            | 219.8       |
| rs200184680 | 16         | 57001581            | 306.9       |
| rs756997703 | 16         | 57001582            | 330.5       |
| rs35874588  | 16         | 57009652            | 111.3       |
| rs12720941  | 16         | 57009658            | 101.3       |
| rs200428946 | 16         | 57012560            | 73.0        |

**Table S3:** LDL-C variants selected from within and around *CETP*; before pruning by minor allele frequency and clumping on linkage disequilibrium

| rs-id       | chromosome | position (build 37) | F-statistic |
|-------------|------------|---------------------|-------------|
| rs711751    | 16         | 56993909            | 22.5        |
| rs17231506  | 16         | 56994528            | 123.1       |
| rs4783961   | 16         | 56994894            | 47.3        |
| rs1800775   | 16         | 56995236            | 101.1       |
| rs35088638  | 16         | 56996158            | 76.2        |
| rs711752    | 16         | 56996211            | 107.2       |
| rs1864163   | 16         | 56997233            | 87.6        |
| rs7203984   | 16         | 56999258            | 70.8        |
| rs11508026  | 16         | 56999328            | 39.2        |
| rs820299    | 16         | 57000284            | 16.0        |
| rs12720922  | 16         | 57000885            | 54.7        |
| rs118146573 | 16         | 57000938            | 41.8        |
| rs12597002  | 16         | 57002404            | 18.7        |
| rs9939224   | 16         | 57002732            | 29.9        |
| rs11076174  | 16         | 57003146            | 21.7        |
| rs7205804   | 16         | 57004889            | 111.9       |
| rs1532625   | 16         | 57005301            | 82.0        |
| rs1532624   | 16         | 57005479            | 113.3       |
| rs11076175  | 16         | 57006378            | 60.8        |
| rs7499892   | 16         | 57006590            | 76.5        |
| rs289714    | 16         | 57007451            | 39.8        |
| rs289719    | 16         | 57009941            | 24.7        |
| rs289741    | 16         | 57017474            | 17.9        |
| rs59207181  | 16         | 57001584            | 78.4        |
| rs186481539 | 16         | 56996647            | 72.1        |
| rs34620476  | 16         | 56996649            | 77.1        |

**Table S4:** HDL-C variants selected from within and around *CETP*; before pruning by minor allele frequency and clumping on linkage disequilibrium

| rs-id       | chromosome | position<br>(build 37) | F-statistic |
|-------------|------------|------------------------|-------------|
| rs711751    | 16         | 56993909               | 619.2       |
| rs12447839  | 16         | 56993935               | 150.1       |
| rs12447924  | 16         | 56994192               | 238.1       |
| rs17231506  | 16         | 56994528               | 1479.7      |
| rs4783961   | 16         | 56994894               | 735.5       |
| rs4783962   | 16         | 56995038               | 331.5       |
| rs1800776   | 16         | 56995234               | 21.8        |
| rs1800775   | 16         | 56995236               | 1479.7      |
| rs35088638  | 16         | 56996158               | 1479.7      |
| rs711752    | 16         | 56996211               | 1479.7      |
| rs5030708   | 16         | 56996279               | 17.2        |
| rs1864163   | 16         | 56997233               | 1479.7      |
| rs7203984   | 16         | 56999258               | 1479.7      |
| rs11508026  | 16         | 56999328               | 1454.8      |
| rs820299    | 16         | 57000284               | 301.6       |
| rs12720922  | 16         | 57000885               | 1455.7      |
| rs118146573 | 16         | 57000938               | 1078.0      |
| rs12597002  | 16         | 57002404               | 462.9       |
| rs9939224   | 16         | 57002732               | 1193.4      |
| rs11076174  | 16         | 57003146               | 576.4       |
| rs7205804   | 16         | 57004889               | 1479.7      |
| rs1532625   | 16         | 57005301               | 1479.7      |
| rs1532624   | 16         | 57005479               | 1479.7      |
| rs117040820 | 16         | 57005762               | 58.3        |
| rs12720873  | 16         | 57006072               | 40.6        |
| rs11076175  | 16         | 57006378               | 1479.7      |
| rs7498892   | 16         | 57006590               | 1479.7      |
| rs9930761   | 16         | 57007192               | 37.4        |
| rs5883      | 16         | 57007353               | 136.3       |
| rs289714    | 16         | 57007451               | 1479.7      |
| rs289717    | 16         | 57009388               | 228.3       |
| rs289719    | 16         | 57009941               | 786.2       |
| rs2033254   | 16         | 57009985               | 19.0        |
| rs4784744   | 16         | 57011185               | 220.9       |
| rs891144    | 16         | 57011936               | 26.0        |
| rs12708980  | 16         | 57012379               | 21.2        |
| rs4784745   | 16         | 57014875               | 203.6       |
| rs5882      | 16         | 57016092               | 259.5       |
| rs9923854   | 16         | 57017002               | 63.6        |
| rs289741    | 16         | 57017474               | 725.7       |
| rs1801706   | 16         | 57017662               | 64.3        |
| rs59207181  | 16         | 57001584               | 1479.7      |
| rs186481539 | 16         | 56996647               | 1462.8      |
| rs192542140 | 16         | 56999353               | 20.8        |
| rs34620476  | 16         | 56996649               | 1479.7      |

**Table S5:** TG variants selected from within and around *CETP*; before pruning by minor allele frequency and clumping on linkage disequilibrium

| rs-id      | chromosome | position<br>(build 37) | F-statistic |
|------------|------------|------------------------|-------------|
| rs711751   | 16         | 56993909               | 22.8        |
| rs17231506 | 16         | 56994528               | 79.2        |

**Table S5:** TG variants selected from within and around *CETP*; before pruning by minor allele frequency and clumping on linkage disequilibrium (*continued*)

| rs-id       | chromosome | position<br>(build 37) | F-statistic |
|-------------|------------|------------------------|-------------|
| rs4783961   | 16         | 56994894               | 32.4        |
| rs1800775   | 16         | 56995236               | 114.0       |
| rs35088638  | 16         | 56996158               | 61.2        |
| rs711752    | 16         | 56996211               | 98.7        |
| rs1864163   | 16         | 56997233               | 72.4        |
| rs7203984   | 16         | 56999258               | 70.5        |
| rs11508026  | 16         | 56999328               | 45.6        |
| rs12720922  | 16         | 57000885               | 44.0        |
| rs118146573 | 16         | 57000938               | 34.1        |
| rs12597002  | 16         | 57002404               | 16.7        |
| rs9939224   | 16         | 57002732               | 24.5        |
| rs11076174  | 16         | 57003146               | 18.8        |
| rs7205804   | 16         | 57004889               | 107.5       |
| rs1532625   | 16         | 57005301               | 72.3        |
| rs1532624   | 16         | 57005479               | 107.2       |
| rs11076175  | 16         | 57006378               | 63.6        |
| rs7499892   | 16         | 57006590               | 66.8        |
| rs289714    | 16         | 57007451               | 41.0        |
| rs59207181  | 16         | 57001584               | 58.7        |
| rs186481539 | 16         | 56996647               | 54.7        |
| rs34620476  | 16         | 56996649               | 57.5        |

**Table S6:** PCSK9 pQTL variants selected from within and around *PCSK9*; before pruning by minor allele frequency and clumping on linkage disequilibrium

| rs-id       | chromosome | position<br>(build 37) | F-statistic |
|-------------|------------|------------------------|-------------|
| rs11591147  | 1          | 55505647               | 72.2        |
| NA          | 1          | 55520994               | 57.7        |
| rs693668    | 1          | 55521109               | 54.7        |
| rs472495    | 1          | 55521313               | 54.7        |
| rs45448095  | 1          | 55505447               | 47.9        |
| rs1165287   | 1          | 55520212               | 46.8        |
| rs11583723  | 1          | 55505926               | 46.6        |
| rs41294819  | 1          | 55504586               | 46.6        |
| rs471705    | 1          | 55521242               | 46.1        |
| rs11583680  | 1          | 55505668               | 45.7        |
| rs373507733 | 1          | 55511372               | 44.7        |
| rs479910    | 1          | 55522141               | 41.2        |
| rs634272    | 1          | 55520265               | 41.1        |
| rs521662    | 1          | 55519238               | 40.7        |
| rs2495477   | 1          | 55518467               | 40.4        |
| rs499883    | 1          | 55519174               | 40.0        |
| rs71991605  | 1          | 55510813               | 38.8        |
| rs4927193   | 1          | 55509872               | 37.9        |
| rs45530931  | 1          | 55510971               | 37.9        |
| rs7546522   | 1          | 55516713               | 37.4        |
| rs639750    | 1          | 55519015               | 36.3        |
| rs625619    | 1          | 55518166               | 33.9        |
| rs2479409   | 1          | 55504650               | 33.4        |
| rs494198    | 1          | 55518528               | 33.3        |
| rs2479410   | 1          | 55505861               | 31.5        |
| rs565436    | 1          | 55524601               | 29.5        |

**Table S6:** PCSK9 pQTL variants selected from within and around *PCSK9*; before pruning by minor allele frequency and clumping on linkage disequilibrium (continued)

| rs-id      | chromosome | position (build 37) | F-statistic |
|------------|------------|---------------------|-------------|
| rs11587071 | 1          | 55522674            | 29.0        |
| rs535471   | 1          | 55514182            | 28.9        |
| rs499718   | 1          | 55512549            | 28.9        |
| rs534473   | 1          | 55514046            | 28.8        |
| rs41294823 | 1          | 55514158            | 28.2        |
| rs557211   | 1          | 55514215            | 28.2        |
| rs479832   | 1          | 55515537            | 28.2        |
| rs10585118 | 1          | 55515668            | 28.2        |
| rs11310630 | 1          | 55522612            | 27.2        |
| rs644000   | 1          | 55511995            | 27.1        |
| rs557435   | 1          | 55520864            | 26.8        |
| rs11436234 | 1          | 55511623            | 26.6        |
| rs10888998 | 1          | 55516508            | 26.3        |
| rs7530425  | 1          | 55511471            | 26.2        |
| rs2483205  | 1          | 55518316            | 26.1        |
| rs11206513 | 1          | 55507649            | 24.5        |

**Table S7:** LDL-C variants selected from within and around *PCSK9*; before pruning by minor allele frequency and clumping on linkage disequilibrium

| rs-id       | chromosome | position (build 37) | F-statistic |
|-------------|------------|---------------------|-------------|
| rs17111503  | 1          | 55503448            | 200.8       |
| rs2479409   | 1          | 55504650            | 222.5       |
| rs11591147  | 1          | 55505647            | 647.3       |
| rs11583680  | 1          | 55505668            | 32.4        |
| rs2479410   | 1          | 55505861            | 106.0       |
| rs4927193   | 1          | 55509872            | 43.5        |
| rs644000    | 1          | 55511995            | 108.8       |
| rs499718    | 1          | 55512549            | 23.7        |
| rs10888997  | 1          | 55513061            | 133.1       |
| rs535471    | 1          | 55514182            | 17.6        |
| rs11206514  | 1          | 55516004            | 142.0       |
| rs572512    | 1          | 55517344            | 111.2       |
| rs625619    | 1          | 55518166            | 56.0        |
| rs2483205   | 1          | 55518316            | 84.1        |
| rs7552841   | 1          | 55518752            | 61.1        |
| rs557435    | 1          | 55520864            | 83.5        |
| rs533375    | 1          | 55523361            | 145.7       |
| rs584626    | 1          | 55523984            | 151.8       |
| rs585131    | 1          | 55524116            | 153.7       |
| rs540796    | 1          | 55524197            | 152.6       |
| rs562556    | 1          | 55524237            | 88.1        |
| rs568052    | 1          | 55524842            | 35.8        |
| rs483462    | 1          | 55525400            | 49.5        |
| rs602705    | 1          | 55525726            | 52.2        |
| rs603247    | 1          | 55525868            | 55.5        |
| rs615563    | 1          | 55526296            | 42.1        |
| rs11206517  | 1          | 55526428            | 21.2        |
| rs516499    | 1          | 55526685            | 61.0        |
| rs630431    | 1          | 55527323            | 69.5        |
| rs378826538 | 1          | 55527479            | 55.8        |

**Table S7:** LDL-C variants selected from within and around *PCSK9*; before pruning by minor allele frequency and clumping on linkage disequilibrium (*continued*)

| rs-id      | chromosome | position<br>(build 37) | F-statistic |
|------------|------------|------------------------|-------------|
| rs643257   | 1          | 55527918               | 57.0        |
| rs12067569 | 1          | 55528629               | 72.2        |
| rs505151   | 1          | 55529187               | 70.7        |
| rs2495477  | 1          | 55518467               | 128.9       |

**Table S8:** GWAS outcome data used in the drug target evaluations of CETP and PCSK9; ordered by number of events and total sample size.

| Outcomes             | No. Events | Sample size | URL                                                                                                                                                                                   |
|----------------------|------------|-------------|---------------------------------------------------------------------------------------------------------------------------------------------------------------------------------------|
| T2DM                 | 74124      | 898130      | <a href="https://www.nature.com/articles/s41588-018-0241-6">https://www.nature.com/articles/s41588-018-0241-6</a>                                                                     |
| Alzheimer            | 71880      | 455258      | <a href="https://www.ncbi.nlm.nih.gov/pubmed/30617256">https://www.ncbi.nlm.nih.gov/pubmed/30617256</a>                                                                               |
| CHD                  | 60801      | 184305      | <a href="https://www.nature.com/articles/ng.3396">https://www.nature.com/articles/ng.3396</a>                                                                                         |
| AF                   | 60620      | 1030836     | <a href="https://www.nature.com/articles/s41588-018-0171-3">https://www.nature.com/articles/s41588-018-0171-3</a>                                                                     |
| HF                   | 47309      | 977323      | <a href="https://www.nature.com/articles/s41467-019-13690-5">https://www.nature.com/articles/s41467-019-13690-5</a>                                                                   |
| CKD                  | 41395      | 480698      | <a href="https://www.ncbi.nlm.nih.gov/pmc/articles/PMC6698888/">https://www.ncbi.nlm.nih.gov/pmc/articles/PMC6698888/</a>                                                             |
| Any stroke           | 40585      | 446696      | <a href="http://www.megastroke.org/index.html">http://www.megastroke.org/index.html</a>                                                                                               |
| Any ischemic stroke  | 34217      | 440328      | <a href="http://www.megastroke.org/index.html">http://www.megastroke.org/index.html</a>                                                                                               |
| IBD                  | 32637      | 62341       | <a href="https://www.ncbi.nlm.nih.gov/pubmed/23128233">https://www.ncbi.nlm.nih.gov/pubmed/23128233</a>                                                                               |
| AMD                  | 16144      | 33976       | <a href="https://www.nature.com/articles/ng.3448">https://www.nature.com/articles/ng.3448</a>                                                                                         |
| MS                   | 14498      | 38589       | <a href="https://www.ncbi.nlm.nih.gov/pmc/articles/PMC3832895/">https://www.ncbi.nlm.nih.gov/pmc/articles/PMC3832895/</a>                                                             |
| Cardioembolic stroke | 7193       | 413304      | <a href="http://www.megastroke.org/index.html">http://www.megastroke.org/index.html</a>                                                                                               |
| UC                   | 6687       | 26405       | <a href="https://www.nature.com/articles/ng.764">https://www.nature.com/articles/ng.764</a>                                                                                           |
| CD                   | 5956       | 21770       | <a href="https://www.nature.com/articles/ng.717">https://www.nature.com/articles/ng.717</a>                                                                                           |
| Small vessel stroke  | 5386       | 411497      | <a href="http://europepmc.org/abstract/MED/20858683">http://europepmc.org/abstract/MED/20858683</a>                                                                                   |
| Asthma               | 5135       | 30810       | <a href="https://www.thelancet.com/journals/lanres/article/PIIS2213-2600(18)30389-8/fulltext">https://www.thelancet.com/journals/lanres/article/PIIS2213-2600(18)30389-8/fulltext</a> |
| Large artery stroke  | 4373       | 410384      | <a href="http://www.megastroke.org/index.html">http://www.megastroke.org/index.html</a>                                                                                               |
| Cognitive function   | 0          | 1131881     | <a href="https://www.nature.com/articles/s41588-018-0147-3">https://www.nature.com/articles/s41588-018-0147-3</a>                                                                     |
| BUN                  | 0          | 480698      | <a href="https://www.ncbi.nlm.nih.gov/pmc/articles/PMC6698888/">https://www.ncbi.nlm.nih.gov/pmc/articles/PMC6698888/</a>                                                             |
| eGFR                 | 0          | 480698      | <a href="https://www.ncbi.nlm.nih.gov/pmc/articles/PMC6698888/">https://www.ncbi.nlm.nih.gov/pmc/articles/PMC6698888/</a>                                                             |
| BMD                  | 0          | 426824      | <a href="https://www.nature.com/articles/s41588-018-0302-x">https://www.nature.com/articles/s41588-018-0302-x</a>                                                                     |
| LDL-C                | 0          | 361194      | <a href="http://www.nealelab.is/uk-biobank">http://www.nealelab.is/uk-biobank</a>                                                                                                     |
| HDL-C                | 0          | 361194      | <a href="http://www.nealelab.is/uk-biobank">http://www.nealelab.is/uk-biobank</a>                                                                                                     |
| TG                   | 0          | 361194      | <a href="http://www.nealelab.is/uk-biobank">http://www.nealelab.is/uk-biobank</a>                                                                                                     |
| LP[a]                | 0          | 361194      | <a href="http://www.nealelab.is/uk-biobank">http://www.nealelab.is/uk-biobank</a>                                                                                                     |

**Table S8:** GWAS outcome data used in the drug tar (*continued*)

| <b>Outcomes</b> | <b>No. Events</b> | <b>Sample size</b> | <b>URL</b>                                                                                                                                                                              |
|-----------------|-------------------|--------------------|-----------------------------------------------------------------------------------------------------------------------------------------------------------------------------------------|
| ApoB            | 0                 | 361194             | <a href="http://www.nealelab.is/uk-biobank">http://www.nealelab.is/uk-biobank</a>                                                                                                       |
| ApoA1           | 0                 | 361194             | <a href="http://www.nealelab.is/uk-biobank">http://www.nealelab.is/uk-biobank</a>                                                                                                       |
| Glucose         | 0                 | 361194             | <a href="http://www.nealelab.is/uk-biobank">http://www.nealelab.is/uk-biobank</a>                                                                                                       |
| HbA1c           | 0                 | 361194             | <a href="http://www.nealelab.is/uk-biobank">http://www.nealelab.is/uk-biobank</a>                                                                                                       |
| Leukocytes      | 0                 | 361194             | <a href="http://www.nealelab.is/uk-biobank">http://www.nealelab.is/uk-biobank</a>                                                                                                       |
| Lymphocytes     | 0                 | 361194             | <a href="http://www.nealelab.is/uk-biobank">http://www.nealelab.is/uk-biobank</a>                                                                                                       |
| Monocytes       | 0                 | 361194             | <a href="http://www.nealelab.is/uk-biobank">http://www.nealelab.is/uk-biobank</a>                                                                                                       |
| Neutrophils     | 0                 | 361194             | <a href="http://www.nealelab.is/uk-biobank">http://www.nealelab.is/uk-biobank</a>                                                                                                       |
| Pulse rate      | 0                 | 361194             | <a href="http://www.nealelab.is/uk-biobank">http://www.nealelab.is/uk-biobank</a>                                                                                                       |
| CRP             | 0                 | 361194             | <a href="http://www.nealelab.is/uk-biobank">http://www.nealelab.is/uk-biobank</a>                                                                                                       |
| DBP             | 0                 | 201529             | <a href="https://www.ncbi.nlm.nih.gov/projects/gap/cgi-bin/study.cgi?study_id=phs000585.v1.p1">https://www.ncbi.nlm.nih.gov/projects/gap/cgi-bin/study.cgi?study_id=phs000585.v1.p1</a> |
| SBP             | 0                 | 201529             | <a href="https://www.ncbi.nlm.nih.gov/projects/gap/cgi-bin/study.cgi?study_id=phs000585.v1.p1">https://www.ncbi.nlm.nih.gov/projects/gap/cgi-bin/study.cgi?study_id=phs000585.v1.p1</a> |

*Note:*

AF: Atrial Fibrillation, AMD: age-related macular degeneration, BMD: bone mineral density, BUN: blood urea nitrogen, CD: Crohn's disease, CHD: coronary heart disease, CKD: chronic kidney disease, CRP: c-reactive protein, DBP: diastolic blood pressure, eGFR: estimated glomerular filtration rate, HF: heart failure, IBD: Inflammatory bowel disease, MS: multiple sclerosis, SBP: systolic blood pressure, T2DM: type 2 diabetes, TG: triglycerides, UB: ulcerative colitis

**Table S9: CETP inhibitor trials**

| Trial        | Pubmed ID | Participants                                                                          | CETP compound | Comparison | Background therapy                                            | CETP dose (mg) | Median follow-up (days) | No. of subject in the intervention group | No. of subject in the comparator group |
|--------------|-----------|---------------------------------------------------------------------------------------|---------------|------------|---------------------------------------------------------------|----------------|-------------------------|------------------------------------------|----------------------------------------|
| ARAI         | 27131642  | FH patients                                                                           | Anacetrapib   | Placebo    | Any Kind Of Statin + Potential Other Lipid Lowering Therapies | 100            | 168                     | 34                                       | 34                                     |
| REVEAL       | 28847206  | Patients with atherosclerotic vascular disease                                        | Anacetrapib   | Placebo    | Atorvastatin                                                  | 100            | 1497                    | 15225                                    | 15224                                  |
| REALIZE      | 25743173  | FH patients                                                                           | Anacetrapib   | Placebo    | Any Kind Of Statin Or Ezetimibe                               | 100            | 448                     | 204                                      | 102                                    |
| DEFINE       | 21082868  | Patients with coronary heart disease or at high risk for coronary heart disease       | Anacetrapib   | Placebo    | Any Kind Of Statin Or Ezetimibe                               | 100            | 532                     | 811                                      | 812                                    |
| TERAMOTO     | 28478132  | High risk dyslipidemia patients                                                       | Anacetrapib   | Placebo    | Any Kind Of Statin + Potential Other Lipid Lowering Therapies | 100            | 364                     | 204                                      | 103                                    |
| BALLENTYNE   | 28624096  | Hypercholesterolemia subjects, not meeting treatment goals.                           | Anacetrapib   | Placebo    | Any Kind Of Statin + Potential Other Lipid Lowering Therapies | 100            | 252                     | 290                                      | 293                                    |
| DAL-PLAQUE   | 21908036  | Subjects with a history of CHD or a high risk of CHD                                  | Dalcetrapib   | Placebo    | Any Kind Of Statin + Potential Other Lipid Lowering Therapies | 600            | 168                     | 64                                       | 66                                     |
| STEIN        | 20097702  | Subjects with a history of CHD or a high risk of CHD                                  | Dalcetrapib   | Placebo    | Atorvastatin                                                  | 900            | 336                     | 89                                       | 56                                     |
| DAL-OUTCOMES | 23126252  | Patients with a recent acute coronary syndrome                                        | Dalcetrapib   | Placebo    | Best Available Care                                           | 600            | 943                     | 7938                                     | 7933                                   |
| DAL-VESSEL   | 22345126  | Patients with CHD or CHD risk equivalent and HDL-C below 50 mg/dL                     | Dalcetrapib   | Placebo    | Any Kind Of Statin Or Ezetimibe                               | 600            | 252                     | 238                                      | 238                                    |
| RADIANCE 1   | 17387131  | FH patients                                                                           | Torcetrapib   | No CETP-I  | Atorvastatin                                                  | 60             | 730                     | 450                                      | 454                                    |
| RADIANCE 2   | 17630038  | Subjects with mixed dyslipidaemia                                                     | Torcetrapib   | No CETP-I  | Atorvastatin                                                  | 60             | 548                     | 377                                      | 375                                    |
| ILLUSTRATE   | 17387129  | Patients with coronary disease                                                        | Torcetrapib   | No CETP-I  | Atorvastatin                                                  | 60             | 730                     | 591                                      | 597                                    |
| ILLUMINATE   | 17984165  | Patients with a history of cardiovascular diseases                                    | Torcetrapib   | No CETP-I  | Atorvastatin                                                  | 120            | 550                     | 7533                                     | 7534                                   |
| ACCELERATE   | 28514624  | High risk patients with a history of ACS, PAD, or T2DM combined with coronary disease | Evacetrapib   | Placebo    | Any Kind Of Statin Or Other Lipid Lowering Therapies          | 130            | 791                     | 6038                                     | 6054                                   |

Note:

FH, familial hypercholesterolaemia



**Table S10:** Compound specific effects of CETP inhibition on lipids, lipoproteins, blood pressure, and clinical endpoints

|                                  | Anacetrapib |            |              |                        | Dalcetrapib |            |              |                     | Torcetrapib |            |              |                        | Evacetrapib |            |              |                        | Heterogeneity p-value |
|----------------------------------|-------------|------------|--------------|------------------------|-------------|------------|--------------|---------------------|-------------|------------|--------------|------------------------|-------------|------------|--------------|------------------------|-----------------------|
|                                  | No. Trials  | No. events | No. subjects | OR/MD 95%CI            | No. Trials  | No. events | No. subjects | OR/MD 95%CI         | No. Trials  | No. events | No. subjects | OR/MD 95%CI            | No. Trials  | No. events | No. subjects | OR/MD 95%CI            |                       |
| LDL-C (% change)                 | 6           | 0          | 30636        | -37.89 (-39.76;-36.03) | 4           | 0          | 16366        | -1.00 (-1.06;-0.94) | 4           | 0          | 17510        | -20.46 (-23.54;-17.37) | 1           | 0          | 12092        | -37.10 (-38.11;-36.09) | < 0.01                |
| HDL-C (% change)                 | 6           | 0          | 30647        | 129.86 (126.88;132.85) | 4           | 0          | 16366        | 28.55 (22.77;34.32) | 4           | 0          | 17510        | 52.15 (49.18;55.12)    | 1           | 0          | 12092        | 131.60 (130.09;133.11) | < 0.01                |
| Triglycerides (% change)         | 6           | 0          | 30647        | -2.98 (-5.12;0.83)     | 4           | 0          | 13273        | 0.03 (-0.93;0.98)   | 4           | 0          | 17467        | -8.56 (-11.12;-6.01)   | 1           | 0          | 12092        | -6.00 (-6.37;-5.63)    | < 0.01                |
| Apolipoprotein A1 (% change)     | 6           | 0          | 30672        | 42.70 (41.24;44.16)    | 3           | 0          | 16363        | 9.25 (6.19;12.31)   | 2           | 0          | 15917        | 24.39 (14.11;34.66)    | 1           | 0          | 12092        | 48.30 (47.35;49.24)    | < 0.01                |
| Apolipoprotein B (% change)      | 6           | 0          | 30673        | -20.40 (-21.94;-18.85) | 1           | 0          | 415          | -4.68 (-7.98;-1.38) | 2           | 0          | 15917        | -15.47 (-22.17;-8.77)  | 1           | 0          | 12092        | -19.30 (-20.09;-18.51) | < 0.01                |
| Lipoprotein a (% change)         | 6           | 0          | 30663        | -40.76 (-43.96;-37.56) | 0           | 0          | 0            | NA (NA;NA)          | 0           | 0          | 0            | NA (NA;NA)             | 1           | 0          | 12092        | -22.30 (-34.86;-9.74)  | < 0.01                |
| Systolic blood pressure (mm Hg)  | 4           | 0          | 32891        | 0.57 (0.14;1.01)       | 2           | 0          | 553          | -1.27 (-2.29;-0.24) | 4           | 0          | 17567        | 4.44 (4.33;4.54)       | 1           | 0          | 12092        | 1.20 (0.69;1.71)       | < 0.01                |
| Diastolic blood pressure (mm Hg) | 4           | 0          | 32897        | 0.17 (-0.09;0.43)      | 2           | 0          | 553          | -0.29 (-0.98;0.40)  | 4           | 0          | 17567        | 2.03 (1.95;2.12)       | 1           | 0          | 12092        | 0.50 (0.20;0.80)       | < 0.01                |
| All-cause mortality              | 3           | 2300       | 33014        | 0.97 (0.90;1.05)       | 1           | 455        | 16478        | 0.99 (0.82;1.18)    | 3           | 168        | 17007        | 1.55 (1.14;2.10)       | 1           | 507        | 12092        | 0.84 (0.71;1.00)       | < 0.01                |
| Any CVD                          | 3           | 3149       | 33014        | 0.93 (0.87;1.00)       | 3           | 1312       | 16343        | 1.03 (0.93;1.14)    | 4           | 1021       | 17911        | 1.22 (1.08;1.38)       | 1           | 1555       | 12092        | 1.01 (0.92;1.10)       | < 0.01                |
| Fatal CVD                        | 2           | 1089       | 32711        | 0.93 (0.82;1.04)       | 0           | 0          | 0            | NA (NA;NA)          | 2           | 87         | 17159        | 1.39 (0.91;2.13)       | 1           | 309        | 12092        | 0.86 (0.69;1.08)       | 0.15                  |
| Fatal and non-fatal MI           | 1           | 1454       | 32711        | 0.87 (0.79;0.96)       | 2           | 1070       | 16343        | 1.00 (0.89;1.12)    | 2           | 363        | 16255        | 1.17 (0.96;1.44)       | 1           | 517        | 12092        | 1.00 (0.84;1.18)       | 0.05                  |
| Fatal MI                         | 0           | 0          | 0            | NA (NA;NA)             | 1           | 244        | 16343        | 0.94 (0.73;1.21)    | 2           | 75         | 16255        | 1.21 (0.77;1.90)       | 0           | 0          | 0            | NA (NA;NA)             | 0.35                  |
| Any stroke                       | 2           | 1118       | 32711        | 0.98 (0.87;1.10)       | 0           | 0          | 0            | NA (NA;NA)          | 3           | 95         | 17159        | 0.97 (0.64;1.46)       | 1           | 192        | 12092        | 0.96 (0.73;1.27)       | 0.99                  |
| Ischemic stroke                  | 1           | 922        | 30517        | 1.00 (0.88;1.13)       | 1           | 164        | 16343        | 1.25 (0.92;1.69)    | 1           | 61         | 15067        | 1.03 (0.63;1.71)       | 0           | 0          | 0            | NA (NA;NA)             | 0.42                  |
| Hemorrhagic stroke               | 1           | 145        | 30517        | 0.99 (0.71;1.36)       | 0           | 0          | 0            | NA (NA;NA)          | 1           | 7          | 15067        | 2.50 (0.49;12.88)      | 0           | 0          | 0            | NA (NA;NA)             | 0.28                  |
| Heart Failure                    | 1           | 7          | 1612         | 0.75 (0.17;3.32)       | 0           | 0          | 0            | NA (NA;NA)          | 0           | 0          | 0            | NA (NA;NA)             | 0           | 0          | 0            | NA (NA;NA)             | 1.00                  |

Note:

Estimates represent fixed effects. OR, odds ratio; MD, mean difference; 95%CI, 95% confidence interval

**Table S11:** Drug target Mendelian randomization effects of CETP or PCSK9 on risk factors, instrumented through genetic association with protein concentration or relevant lipid fractions

|                                       | CETP pQTL    |                     |                       | CETP LDL-C   |                      |                       | CETP HDL-C   |                     |                       | CETP TG      |                        |                       | PCSK9 pQTL   |                     |                       | PCSK9 LDL-C  |                     |                       |
|---------------------------------------|--------------|---------------------|-----------------------|--------------|----------------------|-----------------------|--------------|---------------------|-----------------------|--------------|------------------------|-----------------------|--------------|---------------------|-----------------------|--------------|---------------------|-----------------------|
|                                       | No. variants | MD 95%CI            | heterogeneity p-value | No. variants | MD 95%CI             | heterogeneity p-value | No. variants | MD 95%CI            | heterogeneity p-value | No. variants | MD 95%CI               | heterogeneity p-value | No. variants | MD 95%CI            | heterogeneity p-value | No. variants | MD 95%CI            | heterogeneity p-value |
| LDL-C (mmol/l)                        | 11           | -0.08 (-0.08;-0.08) | < 0.01                | 0            | NA (NA;NA)           | NA                    | 11           | -0.13 (-0.13;-0.13) | < 0.01                | 3            | -0.66 (-0.74;-0.58)    | 0.27                  | 6            | -0.57 (-0.59;-0.55) | < 0.01                | 0            | NA (NA;NA)          | NA                    |
| HDL-C (mmol/l)                        | 3            | 0.24 (0.24;0.24)    | 0.14                  | 2            | 1.83 (1.79;1.87)     | < 0.01                | 0            | NA (NA;NA)          | NA                    | 0            | NA (NA;NA)             | NA                    | 10           | -0.03 (-0.05;-0.01) | 0.09                  | 9            | -0.02 (-0.02;-0.02) | 0.64                  |
| TG (mmol/l)                           | 10           | -0.09 (-0.09;-0.09) | 0.65                  | 7            | -0.72 (-0.76;-0.68)  | 0.01                  | 11           | -0.15 (-0.15;-0.15) | < 0.01                | 0            | NA (NA;NA)             | NA                    | 10           | 0.07 (0.05;0.09)    | 0.01                  | 9            | 0.06 (0.04;0.08)    | 0.11                  |
| LP[a] (nmol/l)                        | 11           | -2.13 (-2.74;-1.52) | 0.14                  | 7            | -9.55 (-12.14;-6.96) | 0.69                  | 11           | -2.75 (-3.18;-2.32) | 0.60                  | 5            | -14.05 (-16.81;-11.29) | 0.97                  | 10           | -3.54 (-5.05;-2.03) | 0.35                  | 9            | -3.42 (-4.71;-2.13) | 0.59                  |
| ApoB (g/l)                            | 8            | -0.03 (-0.03;-0.03) | 0.30                  | 6            | -0.24 (-0.26;-0.22)  | 0.01                  | 10           | -0.05 (-0.05;-0.05) | < 0.01                | 3            | -0.27 (-0.29;-0.25)    | 0.01                  | 6            | -0.15 (-0.15;-0.15) | < 0.01                | 8            | -0.13 (-0.13;-0.13) | < 0.01                |
| ApoA1 (g/l)                           | 4            | 0.14 (0.14;0.14)    | < 0.01                | 2            | 1.02 (0.98;1.06)     | < 0.01                | 1            | 0.19 (0.19;0.19)    | 1.00                  | 0            | NA (NA;NA)             | NA                    | 9            | 0.00 (0.00;0.00)    | 0.13                  | 9            | 0.01 (0.01;0.01)    | 0.18                  |
| SBP (mmHg)                            | 11           | -0.20 (-0.32;-0.08) | 0.39                  | 7            | -1.95 (-2.58;-1.32)  | 0.35                  | 10           | -0.38 (-0.54;-0.22) | 0.08                  | 5            | -2.40 (-3.26;-1.54)    | 0.11                  | 7            | -1.20 (-1.71;-0.69) | 0.04                  | 9            | -1.01 (-1.30;-0.72) | < 0.01                |
| DBP (mmHg)                            | 11           | -0.12 (-0.18;-0.06) | 0.82                  | 7            | -0.84 (-1.19;-0.49)  | 0.91                  | 11           | -0.19 (-0.27;-0.11) | 0.08                  | 5            | -1.13 (-1.48;-0.78)    | 0.59                  | 7            | -0.32 (-0.71;0.07)  | 0.09                  | 9            | -0.27 (-0.45;-0.09) | < 0.01                |
| Pulse rate (bpm)                      | 11           | -0.13 (-0.33;0.07)  | 0.30                  | 7            | 1.18 (0.08;2.28)     | 0.20                  | 11           | -0.14 (-0.30;0.02)  | < 0.01                | 5            | 0.24 (-0.86;1.34)      | 0.28                  | 9            | 1.22 (0.71;1.73)    | < 0.01                | 9            | 1.60 (1.15;2.05)    | 0.01                  |
| Glucose (mmol/l)                      | 10           | -0.02 (-0.04;-0.00) | 0.23                  | 7            | -0.22 (-0.28;-0.16)  | 0.01                  | 9            | -0.06 (-0.08;-0.04) | 0.02                  | 5            | -0.25 (-0.31;-0.19)    | 0.45                  | 10           | -0.03 (-0.07;0.01)  | 0.38                  | 9            | 0.00 (-0.04;0.04)   | 0.06                  |
| HbA1c (mmol/mol)                      | 11           | -0.10 (-0.16;-0.04) | 0.02                  | 7            | -0.69 (-0.98;-0.40)  | 0.04                  | 8            | -0.23 (-0.31;-0.15) | < 0.01                | 5            | -0.89 (-1.20;-0.58)    | 0.05                  | 9            | -0.25 (-0.43;-0.07) | 0.04                  | 9            | -0.15 (-0.31;0.01)  | 0.34                  |
| Leukocytes (10 <sup>9</sup> cells/l)  | 11           | -0.03 (-0.05;-0.01) | 0.06                  | 7            | -0.31 (-0.45;-0.17)  | 0.07                  | 9            | -0.07 (-0.09;-0.05) | 0.12                  | 5            | -0.36 (-0.48;-0.24)    | 0.32                  | 10           | 0.09 (0.03;0.15)    | 0.11                  | 9            | 0.09 (0.03;0.15)    | 0.20                  |
| Lymphocytes (10 <sup>9</sup> cells/l) | 11           | -0.02 (-0.04;-0.00) | 0.11                  | 7            | -0.10 (-0.16;-0.04)  | 0.81                  | 11           | -0.04 (-0.06;-0.02) | 0.10                  | 5            | -0.16 (-0.22;-0.10)    | 0.77                  | 10           | 0.03 (0.01;0.05)    | 0.02                  | 9            | 0.02 (0.00;0.04)    | 0.02                  |
| Monocytes (10 <sup>9</sup> cells/l)   | 11           | -0.01 (-0.01;-0.01) | 0.04                  | 7            | -0.04 (-0.06;-0.02)  | 0.06                  | 10           | -0.01 (-0.01;-0.01) | 0.20                  | 5            | -0.04 (-0.06;-0.02)    | 0.53                  | 10           | 0.01 (0.01;0.01)    | 0.62                  | 9            | 0.00 (0.00;0.00)    | 0.53                  |
| Neutrophils (10 <sup>9</sup> cells/l) | 11           | 0.00 (-0.02;0.02)   | 0.03                  | 6            | -0.10 (-0.20;-0.00)  | 0.20                  | 9            | -0.02 (-0.04;-0.00) | 0.07                  | 5            | -0.16 (-0.26;-0.06)    | 0.09                  | 10           | 0.05 (0.01;0.09)    | 0.01                  | 9            | 0.06 (0.02;0.10)    | 0.36                  |
| CRP (mg/L)                            | 11           | 0.02 (-0.02;0.06)   | 0.89                  | 7            | 0.18 (-0.02;0.38)    | 0.53                  | 11           | 0.03 (-0.01;0.07)   | 0.56                  | 5            | 0.09 (-0.13;0.31)      | 0.89                  | 10           | 0.41 (0.29;0.53)    | 0.01                  | 9            | 0.41 (0.31;0.51)    | 0.01                  |
| BUN (mg/dl)                           | 10           | -0.01 (-0.01;-0.01) | 0.06                  | 7            | -0.04 (-0.06;-0.02)  | 0.31                  | 10           | -0.01 (-0.01;-0.01) | 0.46                  | 5            | -0.05 (-0.07;-0.03)    | 0.93                  | 9            | -0.04 (-0.06;-0.02) | 0.01                  | 8            | -0.04 (-0.06;-0.02) | 0.05                  |
| eGFR (SD of log(eGFR))                | 11           | 0.00 (0.00;0.00)    | 0.37                  | 7            | 0.01 (0.01;0.01)     | 0.49                  | 10           | 0.00 (0.00;0.00)    | 0.02                  | 5            | 0.01 (0.01;0.01)       | 0.98                  | 8            | 0.02 (0.02;0.02)    | 0.16                  | 9            | 0.01 (0.01;0.01)    | 0.01                  |
| BMD (SD)                              | 11           | 0.01 (0.01;0.01)    | 0.69                  | 7            | 0.10 (0.06;0.14)     | 0.55                  | 11           | 0.02 (0.02;0.02)    | 0.01                  | 5            | 0.10 (0.06;0.14)       | 0.41                  | 6            | -0.02 (-0.04;-0.00) | 0.01                  | 5            | -0.02 (-0.04;-0.00) | 0.04                  |
| Congition (SD)                        | 11           | 0.00 (-0.02;0.02)   | 0.07                  | 6            | -0.02 (-0.12;0.08)   | 0.71                  | 11           | -0.02 (-0.02;-0.02) | 0.02                  | 4            | -0.06 (-0.12;-0.00)    | 0.52                  | 9            | -0.01 (-0.05;0.03)  | 0.70                  | 9            | 0.01 (-0.01;0.03)   | 0.71                  |

Note:  
 NA's occurred due to a lack of coverage or, when all variants were removed due to a high risk of horizontal pleiotropy; Effects presented as mean difference (MD) and 95% confidence intervals (95%CI) per unit change in protein or lipid concentration.

**Table S12:** Drug target Mendelian randomization effects of CETP or PCSK9 on clinical outcomes, instrumented through genetic association with protein concentration or relevant lipid fractions

|                      | CETP pQTL    |                  |                       | CETP LDL-C   |                  |                       | CETP HDL-C   |                  |                       | CETP TG      |                  |                       | PCSK9 pQTL   |                  |                       | PCSK9 LDL-C  |                  |                       |
|----------------------|--------------|------------------|-----------------------|--------------|------------------|-----------------------|--------------|------------------|-----------------------|--------------|------------------|-----------------------|--------------|------------------|-----------------------|--------------|------------------|-----------------------|
|                      | No. variants | OR 95%CI         | heterogeneity p-value | No. variants | OR 95%CI         | heterogeneity p-value | No. variants | OR 95%CI         | heterogeneity p-value | No. variants | OR 95%CI         | heterogeneity p-value | No. variants | OR 95%CI         | heterogeneity p-value | No. variants | OR 95%CI         | heterogeneity p-value |
| CHD                  | 11           | 0.95 (0.91;0.99) | 0.20                  | 7            | 0.60 (0.49;0.72) | 0.40                  | 11           | 0.87 (0.84;0.90) | 0.04                  | 5            | 0.52 (0.43;0.63) | 0.39                  | 9            | 0.69 (0.59;0.81) | 0.09                  | 11           | 0.71 (0.65;0.77) | 0.38                  |
| Any stroke           | 11           | 0.99 (0.95;1.03) | 0.22                  | 7            | 1.11 (0.92;1.35) | 0.50                  | 10           | 1.00 (0.96;1.03) | 0.32                  | 5            | 0.97 (0.80;1.16) | 0.61                  | 9            | 0.79 (0.69;0.91) | 0.23                  | 11           | 0.82 (0.76;0.89) | 0.83                  |
| Any ischemic stroke  | 11           | 1.01 (0.96;1.05) | 0.31                  | 7            | 1.07 (0.87;1.31) | 0.76                  | 10           | 1.01 (0.97;1.05) | 0.58                  | 5            | 1.04 (0.85;1.29) | 0.76                  | 9            | 0.86 (0.76;0.97) | 0.43                  | 11           | 0.86 (0.79;0.94) | 0.82                  |
| Large artery stroke  | 11           | 0.96 (0.88;1.06) | 0.01                  | 7            | 0.72 (0.44;1.20) | 0.43                  | 11           | 1.10 (1.02;1.19) | 0.01                  | 5            | 1.80 (0.91;3.55) | 0.13                  | 9            | 0.64 (0.47;0.87) | 0.45                  | 11           | 0.69 (0.55;0.86) | 0.59                  |
| Cardioembolic stroke | 11           | 0.94 (0.87;1.03) | 0.23                  | 7            | 1.23 (0.83;1.82) | 0.51                  | 10           | 0.93 (0.86;1.00) | < 0.01                | 5            | 1.09 (0.71;1.68) | 0.32                  | 9            | 0.76 (0.55;1.05) | 0.07                  | 11           | 0.93 (0.79;1.10) | 0.54                  |
| Small vessel stroke  | 10           | 0.95 (0.84;1.07) | 0.08                  | 7            | 0.48 (0.29;0.78) | 0.38                  | 11           | 0.92 (0.85;0.99) | 0.84                  | 5            | 0.46 (0.29;0.75) | 0.81                  | 9            | 0.81 (0.57;1.15) | 0.14                  | 11           | 0.97 (0.79;1.17) | 0.89                  |
| HF                   | 11           | 0.95 (0.92;0.99) | 0.30                  | 7            | 0.59 (0.50;0.70) | 0.55                  | 11           | 0.96 (0.93;0.99) | 0.09                  | 5            | 0.82 (0.67;1.00) | 0.21                  | 9            | 0.79 (0.71;0.87) | 0.35                  | 11           | 0.83 (0.77;0.89) | 0.20                  |
| AF                   | 11           | 0.99 (0.96;1.01) | 0.73                  | 7            | 0.78 (0.69;0.89) | 0.99                  | 11           | 0.99 (0.96;1.02) | 0.05                  | 5            | 0.87 (0.75;0.99) | 0.72                  | 10           | 0.90 (0.83;0.97) | 0.88                  | 11           | 0.89 (0.84;0.94) | 0.64                  |
| T2DM                 | 11           | 1.00 (0.98;1.02) | 0.44                  | 7            | 0.87 (0.77;0.99) | 0.50                  | 11           | 0.96 (0.94;0.98) | 0.88                  | 5            | 0.71 (0.62;0.82) | 0.36                  | 9            | 1.10 (0.99;1.21) | 0.06                  | 10           | 1.01 (0.96;1.07) | 0.58                  |
| CKD                  | 11           | 0.94 (0.91;0.98) | 0.57                  | 7            | 0.58 (0.48;0.71) | 0.70                  | 9            | 0.91 (0.88;0.94) | 0.47                  | 5            | 0.62 (0.51;0.75) | 0.98                  | 9            | 0.83 (0.72;0.94) | 0.16                  | 11           | 0.92 (0.83;1.01) | 0.13                  |
| Asthma               | 11           | 1.00 (0.91;1.11) | 0.18                  | 7            | 1.38 (0.88;2.15) | 0.38                  | 10           | 1.05 (0.94;1.17) | 0.08                  | 5            | 1.67 (1.06;2.64) | 0.76                  | 11           | 1.97 (1.56;2.48) | 0.96                  | 11           | 1.55 (1.28;1.88) | 0.24                  |
| IBD                  | 11           | 0.98 (0.92;1.05) | 0.62                  | 7            | 1.38 (0.98;1.95) | 0.49                  | 10           | 1.09 (1.00;1.19) | 0.07                  | 5            | 2.35 (1.40;3.96) | 0.08                  | 9            | 1.04 (0.84;1.29) | 0.53                  | 11           | 0.99 (0.85;1.14) | 0.74                  |
| CD                   | 11           | 0.93 (0.85;1.02) | 0.44                  | 7            | 1.10 (0.68;1.80) | 0.37                  | 10           | 1.04 (0.95;1.14) | 0.03                  | 5            | 1.17 (0.71;1.92) | 0.39                  | 9            | 1.25 (0.89;1.76) | 0.22                  | 11           | 0.98 (0.80;1.21) | 0.93                  |
| UC                   | 11           | 1.03 (0.95;1.13) | 0.67                  | 7            | 1.90 (1.23;2.94) | 0.79                  | 10           | 1.15 (1.05;1.24) | 0.01                  | 5            | 3.55 (2.13;5.93) | 0.28                  | 9            | 1.04 (0.80;1.36) | 0.65                  | 11           | 1.09 (0.91;1.32) | 0.47                  |
| MS                   | 3            | 1.05 (0.95;1.16) | 0.91                  | 2            | 1.48 (0.71;3.07) | 0.90                  | 3            | 1.08 (0.93;1.25) | 0.95                  | 2            | 1.53 (0.68;3.47) | 0.97                  | 5            | 0.69 (0.50;0.96) | 0.73                  | 5            | 0.71 (0.55;0.93) | 0.79                  |
| Alzheimer            | 11           | 0.99 (0.90;1.08) | 0.05                  | 7            | 1.63 (1.06;2.49) | 0.08                  | 10           | 0.97 (0.92;1.04) | 0.50                  | 5            | 1.36 (0.98;1.90) | 0.48                  | 7            | 2.43 (1.93;3.06) | 0.66                  | 10           | 1.82 (1.54;2.16) | < 0.01                |
| AMD                  | 9            | 1.31 (1.22;1.40) | < 0.01                | 0            | NA (NA;NA)       | NA                    | 8            | 1.12 (1.03;1.21) | < 0.01                | 0            | NA (NA;NA)       | NA                    | 9            | 1.04 (0.84;1.29) | 0.32                  | 11           | 1.01 (0.86;1.18) | 0.18                  |

Note:  
NA's occurred due to a lack of coverage, or when all variants were removed due to a high risk of horizontal pleiotropy; Effects presented as mean difference (OR) and 95% confidence intervals (95%CI) per unit change in protein or lipid concentration.

# Methods

## *GWAS data: outcome traits*

We used GWAS data for the following outcomes (Supplementary Table S8). Data were available from the UK biobank (UKB - nealelab.is/uk-biobank) on major circulating lipid sub-fractions or apolipoproteins (LDL-C, HDL-C, triglycerides [TG], lipoprotein A [Lp(a)], apolipoprotein B [apoB], apolipoprotein A1 [apoA1]), pulse rate (PR), glucose and HbA1c, leukocytes, lymphocytes, monocytes, neutrophil counts, and C-reactive protein (CRP). Blood pressure (systolic and diastolic [SBP, DBP]) data were available from Evangelou [1] which incorporates data from UKB. Carotid artery intima media thickness (cIMT) was available from a meta-analysis of the Cohorts for Aging Research in Genomic Epidemiology (CHARGE)[2] and University College London Edinburgh Bristol (UCLEB)[3]. The CKDGen consortium provided GWAS associations on blood urea nitrogen (BUN), estimated glomerular filtration rate (eGFR), and chronic kidney disease (CKD)[4]. Bone mineral density (BMD)[5] GWAS data were obtained from GEFOS Consortium. Genetic associations with “general cognitive function” were obtained from a meta-analysis of CHARGE, COGENT and UKB[6]. GWAS data on CHD were available from CardiogramplusC4D[7]; any stroke, large artery stroke, cardioembolic stroke, and small vessel stroke from the MEGASTROKE consortium[8]; heart failure (HF) from HERMES[9], and atrial fibrillation (AF) from the AFgen consortium[10]. We also extracted summary level genetic effect estimates for type 2 diabetes (T2DM)[11] from DIAGRAM; asthma[12], inflammatory bowel disease (IBD)[13], Crohn’s disease (CD)[14] and ulcerative colitis (UC)[15] from IIBDGC; multiple sclerosis (MS)[16] from the IMSG consortium; Alzheimer’s disease (AD)[17] from a meta-analysis of the PGC-ALZ, IGAP and ADSP consortia; and age-related macular degeneration (AMD) from IAMDGC[18]-[19].

## *Software*

Analyses were conducted using Python v3.7.4 (for GNU Linux), Pandas v0.25, Numpy v1.15, Seaborn, R v3.6.1 (for GNU Linux), ggplot2, and forestplot.

# Results

## *CETP inhibitor dose-response and compound potency*

In-silico IC50 measurements, representing the dosage necessary for 50% inhibition, were extracted from ChEMBL (v25). The IC50 measurements were relatively comparable between anacetrapib (7-60 nmol/L; n=5), evacetrapib (26-110 nmol/L; n=2) and torcetrapib (3-160 nmol/L; n=8). For dalcetrapib these measurements were considerably higher: 4100-6000 nmol/L (N=2).

The four included CETP inhibitors all showed a dose response relation with high-density lipoprotein cholesterol (HDL-C). Evacetrapib had the strongest response, with HDL-C increasing between 54% and 129% (from baseline) at escalating doses of 30-500 mg per day[20]. Torcetrapib increased HDL-C by 16% to 91% (10-240 mg per day)[21], followed by anacetrapib: 9% to 48% (10-300 mg per day)[22]. At 4% to 34% for 300-900 mg per day[23], dalcetrapib, while still comparable to anacetrapib, showed the weakest dose response.

In general the difference in potency and dose-response were minimal between anacetrapib, evacetrapib, and torcetrapib, and were prescribed to a similar dosage in phase 3 RCT. The clear difference of dalcetrapib, which was considerably less potent, resulting in a marked increase in daily dosage, between 600 and 900 mg.

| Drug        | Potency (IC50) |                | Phase 1    |               | Phase 3    |
|-------------|----------------|----------------|------------|---------------|------------|
|             | Mean (nmol/L)  | Range (nmol/L) | Dose (mg)  | %Δ HDL-C (mg) | Dose       |
| Anacetrapib | 36             | 17 to 60       | 10 to 300  | 9 to 48       | 100        |
| Dalcetrapib | 5050           | 4100 to 6000   | 300 to 900 | 4 to 34       | 600 to 900 |
| Evacetrapib | 68             | 26 to 110      | 30 to 500  | 54 to 129     | 130        |
| Torcetrapib | 52             | 3 to 160       | 10 to 240  | 16 to 91      | 60 to 120  |

**Table S13:** Describing the pre-clinical drug potency (IC50), drug response in phase 1 clinical studies and the final choice of drug dose in phase 3 RCT

# *Acknowledgements*

## *UCLEB consortium*

We gratefully acknowledge the following UCLEB contributors: Dale C, Dudbridge F, Engmann J, Garfield V, Jefferis B, Kuh D, Mclachlan S, Menon U, Price A, Talmud P, Tillin T, Walker A, Ben-Shlomo Y, Cooper Y, Hypponen E, Jefferis B, Kumari M, Shah T, Talmud P, Whincup P.

## Bibliography

- [1] Evangelos Evangelou et al. "Genetic analysis of over 1 million people identifies 535 new loci associated with blood pressure traits." In: *Nature genetics* 50 (10 Oct. 2018), pp. 1412–1425. ISSN: 1546-1718. DOI: 10.1038/s41588-018-0205-x. ppublish.
- [2] Bruce M. Psaty et al. "Cohorts for Heart and Aging Research in Genomic Epidemiology (CHARGE) Consortium: Design of prospective meta-analyses of genome-wide association studies from 5 cohorts." In: *Circulation. Cardiovascular genetics* 2 (1 Feb. 2009), pp. 73–80. ISSN: 1942-3268. DOI: 10.1161/CIRCGENETICS.108.829747. ppublish.
- [3] Tina Shah et al. "Population genomics of cardiometabolic traits: design of the University College London-London School of Hygiene and Tropical Medicine-Edinburgh-Bristol (UCLEB) Consortium." In: *PloS one* 8 (8 2013), e71345. ISSN: 1932-6203. DOI: 10.1371/journal.pone.0071345. epubliish.
- [4] Matthias Wuttke et al. "A catalog of genetic loci associated with kidney function from analyses of a million individuals." In: *Nature genetics* 51 (6 June 2019), pp. 957–972. ISSN: 1546-1718. DOI: 10.1038/s41588-019-0407-x. ppublish.
- [5] John A. Morris et al. "An atlas of genetic influences on osteoporosis in humans and mice." In: *Nature genetics* 51 (2 Feb. 2019), pp. 258–266. ISSN: 1546-1718. DOI: 10.1038/s41588-018-0302-x. ppublish.
- [6] Gail Davies et al. "Study of 300,486 individuals identifies 148 independent genetic loci influencing general cognitive function." In: *Nature communications* 9 (1 May 2018), p. 2098. ISSN: 2041-1723. DOI: 10.1038/s41467-018-04362-x. epubliish.
- [7] Majid Nikpay et al. "A comprehensive 1,000 Genomes-based genome-wide association meta-analysis of coronary artery disease." In: *Nature genetics* 47 (10 Oct. 2015), pp. 1121–1130. ISSN: 1546-1718. DOI: 10.1038/ng.3396.

- [8] Rainer Malik et al. "Multiancestry genome-wide association study of 520,000 subjects identifies 32 loci associated with stroke and stroke subtypes." In: *Nature genetics* 50 (4 Apr. 2018), pp. 524–537. ISSN: 1546-1718. DOI: 10.1038/s41588-018-0058-3. ppublish.
- [9] Sonia Shah et al. "Genome-wide association and Mendelian randomisation analysis provide insights into the pathogenesis of heart failure." In: *Nature communications* 11 (1 Jan. 2020), p. 163. ISSN: 2041-1723. DOI: 10.1038/s41467-019-13690-5. epubli.
- [10] Jonas B. Nielsen et al. "Biobank-driven genomic discovery yields new insight into atrial fibrillation biology." In: *Nature genetics* 50 (9 Sept. 2018), pp. 1234–1239. ISSN: 1546-1718. DOI: 10.1038/s41588-018-0171-3. ppublish.
- [11] Anubha Mahajan et al. "Refining the accuracy of validated target identification through coding variant fine-mapping in type 2 diabetes." In: *Nature genetics* 50 (4 Apr. 2018), pp. 559–571. ISSN: 1546-1718. DOI: 10.1038/s41588-018-0084-1. ppublish.
- [12] Nick Shrine et al. "Moderate-to-severe asthma in individuals of European ancestry: a genome-wide association study." In: *The Lancet. Respiratory medicine* 7 (1 Jan. 2019), pp. 20–34. ISSN: 2213-2619. DOI: 10.1016/S2213-2600(18)30389-8. ppublish.
- [13] Luke Jostins et al. "Host-microbe interactions have shaped the genetic architecture of inflammatory bowel disease." In: *Nature* 491 (7422 Nov. 2012), pp. 119–124. ISSN: 1476-4687. DOI: 10.1038/nature11582. ppublish.
- [14] Andre Franke et al. "Genome-wide meta-analysis increases to 71 the number of confirmed Crohn's disease susceptibility loci." In: *Nature genetics* 42 (12 Dec. 2010), pp. 1118–1125. ISSN: 1546-1718. DOI: 10.1038/ng.717. ppublish.
- [15] Carl A. Anderson et al. "Meta-analysis identifies 29 additional ulcerative colitis risk loci, increasing the number of confirmed associations to 47." In: *Nature genetics* 43 (3 Mar. 2011), pp. 246–252. ISSN: 1546-1718. DOI: 10.1038/ng.764. ppublish.
- [16] International Multiple Sclerosis Genetics Consortium. "Multiple sclerosis genomic map implicates peripheral immune cells and microglia in susceptibility." In: *Science (New York, N.Y.)* 365 (6460 Sept. 2019). ISSN: 1095-9203. DOI: 10.1126/science.aav7188. ppublish.
- [17] Iris E. Jansen et al. "Genome-wide meta-analysis identifies new loci and functional pathways influencing Alzheimer's disease risk." In: *Nature genetics* 51 (3 Mar. 2019), pp. 404–413. ISSN: 1546-1718. DOI: 10.1038/s41588-018-0311-9. ppublish.



- [18] Lars G. Fritsche et al. "A large genome-wide association study of age-related macular degeneration highlights contributions of rare and common variants." In: *Nature genetics* 48 (2 Feb. 2016), pp. 134–143. ISSN: 1546-1718. DOI: 10.1038/ng.3448. ppublish.
- [19] Stephen Burgess, Verena Zuber, Elsa Valdes-Marquez, Benjamin B Sun, and Jemma C Hopewell. "Mendelian randomization with fine-mapped genetic data: Choosing from large numbers of correlated instrumental variables." In: *Genetic epidemiology* 41 (8 Dec. 2017), pp. 714–725. ISSN: 1098-2272. DOI: 10.1002/gepi.22077.
- [20] Stephen J. Nicholls et al. "Effects of the CETP Inhibitor Evacetrapib Administered as Monotherapy or in Combination With Statins on HDL and LDL Cholesterol: A Randomized Controlled Trial". In: *JAMA* 306.19 (2011), pp. 2099–2109. DOI: 10.1001/jama.2011.1649.
- [21] Ronald W. Clark et al. "Raising high-density lipoprotein in humans through inhibition of cholesteryl ester transfer protein: an initial multi-dose study of torcetrapib." In: *Arterioscler. Thromb. Vasc. Biol.* (2004).
- [22] Hayes M. Dansky et al. "Efficacy and safety after cessation of treatment with the cholesteryl ester transfer protein inhibitor anacetrapib (MK-0859) in patients with primary hypercholesterolemia or mixed hyperlipidemia". In: *American Heart Journal* 162.4 (2011), pp. 708–716. DOI: <https://doi.org/10.1016/j.ahj.2011.07.010>.
- [23] Greetje J. De Grooth et al. "Efficacy and safety of a novel cholesteryl ester transfer protein inhibitor, JTT-705, in humans: a randomized phase II dose-response study." In: *Circulation* (2002).
